# Supplementary material
Source: publisher figshare collection journal article supplement (https://karger.figshare.com/ndownloader/files/28409796)
Supplement: Supplementary file 1 [file 28409796]

**S. Table 4.** Meta-analysis of proportion of COVID-19 patients receiving KRT across different studies.

| **Study** | **Event/Sample size** | **Proportion (%) (95% CI)** | **Random Weight (%)** |
| --- | --- | --- | --- |
| **Argenziano, MG et al., 2020** | 47/340 | 13.82% (10.34% - 17.96%) | 3.23 |
| **Chen, N et al., 2020** | 9/99 | 9.09% (4.24% - 16.56%) | 3.06 |
| **Chen, T et al., 2020** | 3/274 | 1.1% (0.23% - 3.17%) | 3.21 |
| **Cummmings, MJ et al., 2020** | 79/257 | 30.74% (25.16% - 36.77%) | 3.21 |
| **Derespina, K et al., 2020** | 1/70 | 1.43% (0.04% - 7.7%) | 2.97 |
| **Du, Y et al., 2020** | 8/85 | 9.41% (4.15% - 17.71%) | 3.02 |
| **Dudoignan, E et al., 2020** | 5/51 | 9.8% (3.26% - 21.41%) | 2.86 |
| **Fisher, M et al., 2020** | 265/5,407 | 4.9% (4.34% - 5.51%) | 3.31 |
| **Guan, W et al., 2020** | 9/1,099 | 0.82% (0.38% - 1.55%) | 3.29 |
| **Gupte, S et al., 2020** | 191/948 | 20.15% (17.64% - 22.85%) | 3.28 |
| **Guqin, Z et al., 2020** | 5/221 | 2.26% (0.74% - 5.2%) | 3.19 |
| **Hong, KS et al., 2020** | 3/98 | 3.06% (0.64% - 8.69%) | 3.06 |
| **Huang, C et al., 2020** | 3/41 | 7.32% (1.54% - 19.93%) | 2.77 |
| **ICNARC et al., 2020** | 2287/8,796 | 26% (25.09% - 26.93%) | 3.31 |
| **Jamie, H et al., 2020** | 285/5,449 | 5.23% (4.65% - 5.86%) | 3.31 |
| **Lim, JH et al., 2020** | 5/30 | 16.67% (5.64% - 34.72%) | 2.61 |
| **Ling, H et al., 2020** | 72/323 | 22.29% (17.87% - 27.23%) | 3.23 |
| **Ling, L et al., 2020** | 2/8 | 25% (3.19% - 65.09%) | 1.73 |
| **Pelayo, J et al., 2020** | 18/223 | 8.07% (4.85% - 12.46%) | 3.19 |
| **Qiao, S et al., 2020** | 5/101 | 4.95% (1.63% - 11.18%) | 3.06 |
| **Richardson, S et al., 2020** | 81/2,634 | 3.08% (2.45% - 3.81%) | 3.3 |
| **Ruan, Q et al., 2020** | 5/150 | 3.33% (1.09% - 7.61%) | 3.14 |
| **Ruben, S et al., 2020** | 10/57 | 17.54% (8.75% - 29.91%) | 2.9 |
| **Su, H et al., 2020** | 5/26 | 19.23% (6.56% - 39.35%) | 2.53 |
| **Wang, D et al., 2020** | 2/138 | 1.45% (0.18% - 5.14%) | 3.12 |
| **Xin-Ying, Z et al., 2020** | 3/91 | 3.3% (0.69% - 9.33%) | 3.04 |
| **Xu, J et al., 2020** | 12/239 | 5.02% (2.62% - 8.61%) | 3.2 |
| **Xu, Y et al., 2020** | 4/45 | 8.89% (2.48% - 21.22%) | 2.81 |
| **Yang, X et al., 2020** | 9/52 | 17.31% (8.23% - 30.33%) | 2.86 |
| **Yi, Z et al., 2020** | 5/34 | 14.71% (4.95% - 31.06%) | 2.68 |
| **Yu, Y et al., 2020** | 24/226 | 10.62% (6.92% - 15.39%) | 3.19 |
| **Zhen, L et al., 2020** | 7/193 | 3.63% (1.47% - 7.33%) | 3.18 |
| **Zhou, F et al., 2020** | 10/191 | 5.24% (2.54% - 9.42%) | 3.17 |
| **Total (random effects)** | 3,478/27,996 | 8.83% (5.64% - 12.66%) | 100 |
